# Supplementary material
Source: PubMed Central journal article supplement (PMC2856640)

**eTABLE 1. Pearson Correlation Coefficients and (Ns) for Fasting Insulin, IGF-I, and BP3 with Age and BMI among Premenopausal Blacks and Whites in the NIEHS Uterine Fibroid Study**

|         | Blacks     |             |             | Whites     |             |             |
|---------|------------|-------------|-------------|------------|-------------|-------------|
|         | Insulin    | IGF-I       | BP3         | Insulin    | IGF-I       | BP3         |
| Age     | 0.00 (568) | -0.18 (570) | -0.07 (570) | 0.08 (392) | -0.28 (397) | -0.15 (397) |
| BMI     | 0.31 (569) | -0.23 (571) | -0.03 (571) | 0.50 (392) | -0.24 (397) | -0.05 (397) |
| Insulin | -----      | -0.04 (564) | 0.07 (564)  | -----      | -0.14 (392) | 0.02 (391)  |
| IGF-I   | -----      | -----       | 0.41 (571)  | -----      | -----       | 0.54 (397)  |

**eTable 2. Numbers of Women with and without Fibroids in Each Exposure Category of IGF-I, BP3, and Insulin.**

|                        |        | <b>Blacks</b> | <b>Whites</b> |
|------------------------|--------|---------------|---------------|
| <b>IGF-I (tertile)</b> |        | <b>N*</b>     | <b>N*</b>     |
| All Fibroids           | Low    | 152:56        | 71:40         |
|                        | Middle | 135:48        | 68:76         |
|                        | High   | 124:49        | 60:79         |
| Small Fibroids         | Low    | 32:56         | 26:40         |
|                        | Middle | 26:48         | 21:76         |
|                        | High   | 33:49         | 22:79         |
| Medium Fibroids        | Low    | 64:56         | 35:40         |
|                        | Middle | 67:48         | 30:76         |
|                        | High   | 54:49         | 22:79         |
| Large Fibroids         | Low    | 56:56         | 10:40         |
|                        | Middle | 42:48         | 17:76         |
|                        | High   | 37:49         | 16:79         |
| <b>BP3 (tertile)</b>   |        |               |               |
| All Fibroids           | Low    | 164:63        | 53:40         |
|                        | Middle | 142:51        | 61:63         |
|                        | High   | 105:39        | 85:92         |
| Small Fibroids         | Low    | 31:63         | 15:40         |

|                          |        |        |       |
|--------------------------|--------|--------|-------|
|                          | Middle | 34:51  | 28:63 |
|                          | High   | 26:39  | 26:92 |
| Medium Fibroids          | Low    | 75:63  | 28:40 |
|                          | Middle | 59:51  | 23:63 |
|                          | High   | 51:39  | 36:92 |
| Large Fibroids           | Low    | 58:63  | 10:40 |
|                          | Middle | 49:51  | 10:63 |
|                          | High   | 28:39  | 23:92 |
| <b>Insulin (tertile)</b> |        |        |       |
| All Fibroids             | Low    | 87:35  | 99:99 |
|                          | Middle | 143:50 | 57:63 |
|                          | High   | 180:67 | 41:30 |
| Small Fibroids           | Low    | 13:35  | 33:99 |
|                          | Middle | 34:50  | 18:63 |
|                          | High   | 45:67  | 16:30 |
| Medium Fibroids          | Low    | 31:35  | 47:99 |
|                          | Middle | 64:50  | 23:63 |
|                          | High   | 89:67  | 17:30 |
| Large Fibroids           | Low    | 43:35  | 19:99 |
|                          | Middle | 45:50  | 16:63 |
|                          | High   | 46:67  | 8:30  |

\* This table provides the Ns (no.with fibroids:no. without fibroids) for Figure 2, print version of the manuscript.



**eFigure The Distribution of Insulin, IGF-I, and BP3 for Premenopausal Blacks and Whites in the NIEHS Uterine Fibroid Study.**

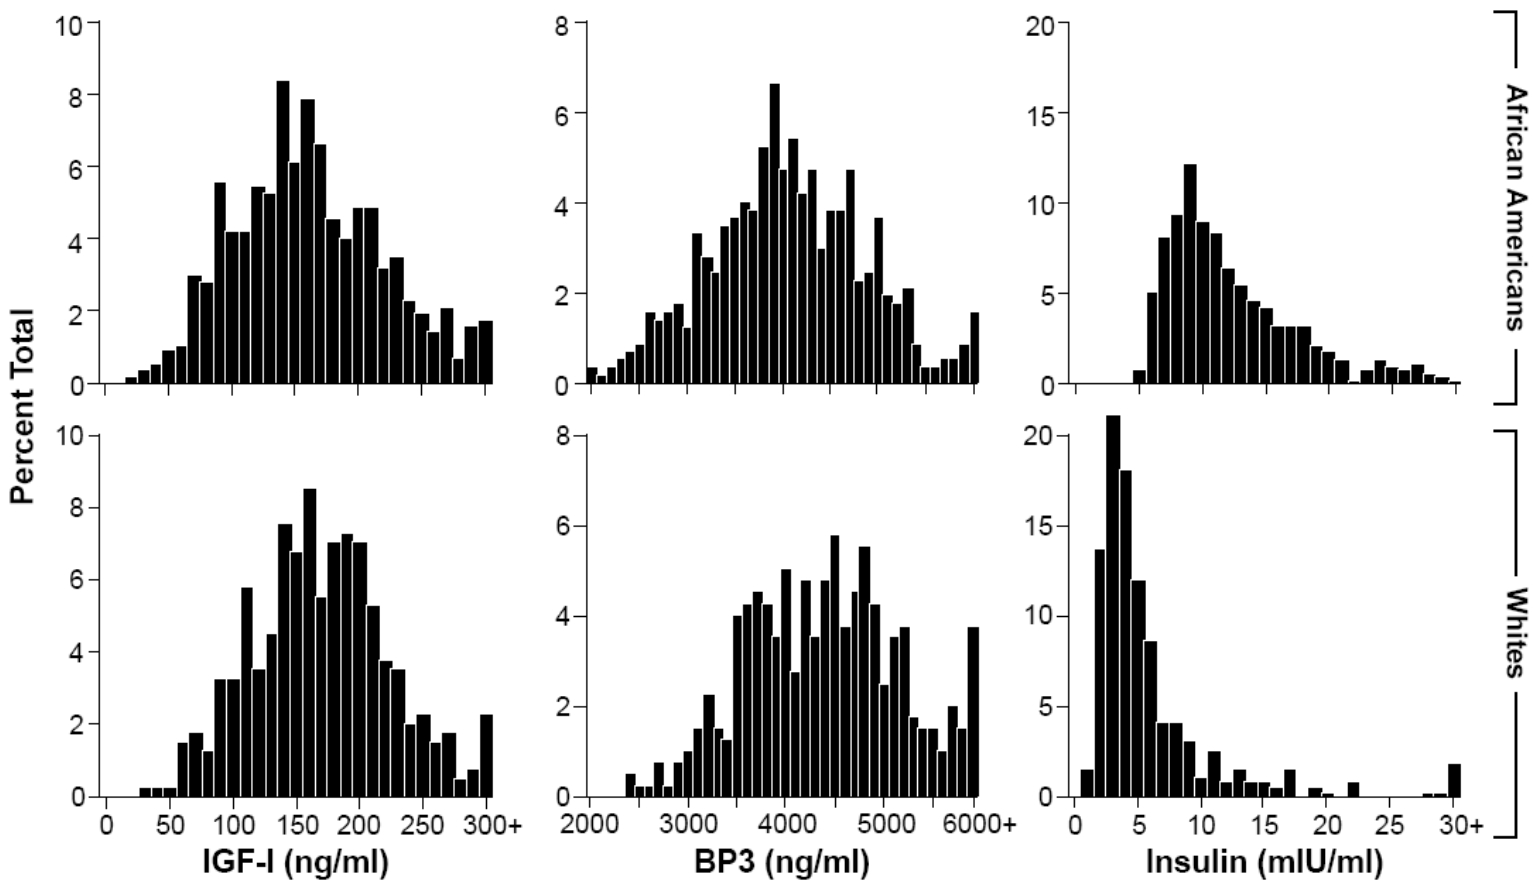

Supplement: NIHMS175330-supplement-supplement_1.pdf [file NIHMS175330-supplement-supplement_1.pdf]
